# Supplementary material
Source: PubMed Central journal article supplement (PMC2148341)
Supplement: pnas_0709597104_2.pdf [file pnas_0709597104_2.pdf]

**SI Table 3.** Segregation ratio of the *BAR* gene conferring phosphinothricin herbicide resistance to SAIL\_793\_H10 (*thiC*)

| Line | Basta-resistant | Basta-sensitive | Total | % Sensitive |
|------|-----------------|-----------------|-------|-------------|
| 13   | 295             | 102             | 397   | 25.7        |
| 16   | 344             | 87              | 431   | 20.2        |
| 17   | 385             | 123             | 508   | 24.2        |

Progeny of selfed heterozygous line SAIL\_793\_H10 were analyzed for resistance and sensitivity to Basta™.
