# Supplementary material
Source: PubMed Central journal article supplement (PMC2148341)
Supplement: pnas_0709597104_3.pdf [file pnas_0709597104_3.pdf]

**SI Table 4.** Absolute metabolite contents of *Arabidopsis* WT and *thiC*.Substantial increases are highlighted in red ( $\geq 2$ -fold), while decreases ( $\leq 0.5$ -fold) are in green.

Standard errors are the average of six experimental repetitions. n.d.: not determined.

| Metabolite           | WT – B1          | <i>thiC</i> –B1   | <i>thiC</i> + B1 |
|----------------------|------------------|-------------------|------------------|
|                      | nmol/g FW        |                   |                  |
| <b>Amino acids</b>   |                  |                   |                  |
| Alanine              | 1659.32±214.93   | 16026.86±3712.54  | 2402.78±214.83   |
| Arginine             | 1581.89±309.04   | 2030.18±427.94    | 3888.56±558.68   |
| Asparagine           | 13482.14±2387.63 | 86217.40±19301.98 | 67971.35±8343.32 |
| Aspartate            | 7352.95±752.17   | 7089.73±445.70    | 8073.12±113.20   |
| $\beta$ -alanine     | 736.45±48.27     | 2610.44±279.72    | 1027.77±34.12    |
| Cysteine             | 1.87±0.17        | 6.83±0.68         | 8.95±0.55        |
| Glutamate            | 1619.25±206.45   | 4123.96±274.74    | 2244.80±199.96   |
| Glycine              | 3550.87±2215.50  | 464.03±80.87      | 179.72±22.54     |
| Lysine               | 110.74±4.70      | 571.08±70.56      | 555.22±30.51     |
| Methionine           | 20.14±1.34       | 167.02±29.48      | 163.21±14.28     |
| Phenylalanine        | 148.88±25.91     | 3483.38±411.69    | 2460.96±187.36   |
| Proline              | 3803.58±426.11   | 4626.14±273.41    | 8058.20±818.25   |
| Serine               | 6508.78±350.83   | 8361.67±229.09    | 3509.06±79.55    |
| Threonine            | 3540.00±72.35    | 4566.50±197.11    | 2036.17±42.78    |
| Tryptophan           | 271.82±94.45     | 11995.54±2727.50  | 11604.36±1275.24 |
| Tyramine             | 70.65±6.58       | 79.74±4.00        | 74.94±4.82       |
| Valine               | 427.56±50.37     | 1214.24±167.00    | 846.54±42.21     |
| <b>Organic acids</b> |                  |                   |                  |
| Butyrate             | 1321.15±184.33   | 8073.63±1121.52   | 3275.12±146.53   |
| Citrate              | 346.98±122.07    | 420.19±145.76     | 289.86±103.60    |
| Fumarate             | 4730.97±620.11   | 1092.53±188.12    | 289.86±103.60    |
| Glycerate            | 2.04±0.83        | 2.69±1.10         | 0.35±0.14        |
| Glycerol             | n.d.             | n.d.              | n.d.             |
| Isocitrate           | 1566.49±301.14   | 2770.63±514.87    | 2668.75±154.82   |
| Malate               | 2706.74±382.09   | 6792.31±1798.61   | 2538.61±1590.66  |
| <b>Sugars</b>        |                  |                   |                  |
| Fructose             | 5374.28±1029.98  | 7755.64±863.73    | 7590.55±1590.66  |
| Gentiobiose          | n.d.             | n.d.              | n.d.             |
| Glucose              | 13072.23±593.39  | 18219.74±1473.54  | 18134.25±2172.60 |
| Raffinose            | 65.29±24.62      | 29.55±6.50        | 24.92±2.61       |
| Ribose               | 79.76±4.39       | 23.34±2.33        | 29.72±3.37       |
| Sucrose              | 28462.30±1636.23 | 22251.03±3202.63  | 22455.11±2537.12 |
| Trehalose            | 483.55±27.80     | 498.42±56.26      | 347.26±13.39     |
