# Supplementary material
Source: PubMed Central journal article supplement (PMC2148341)

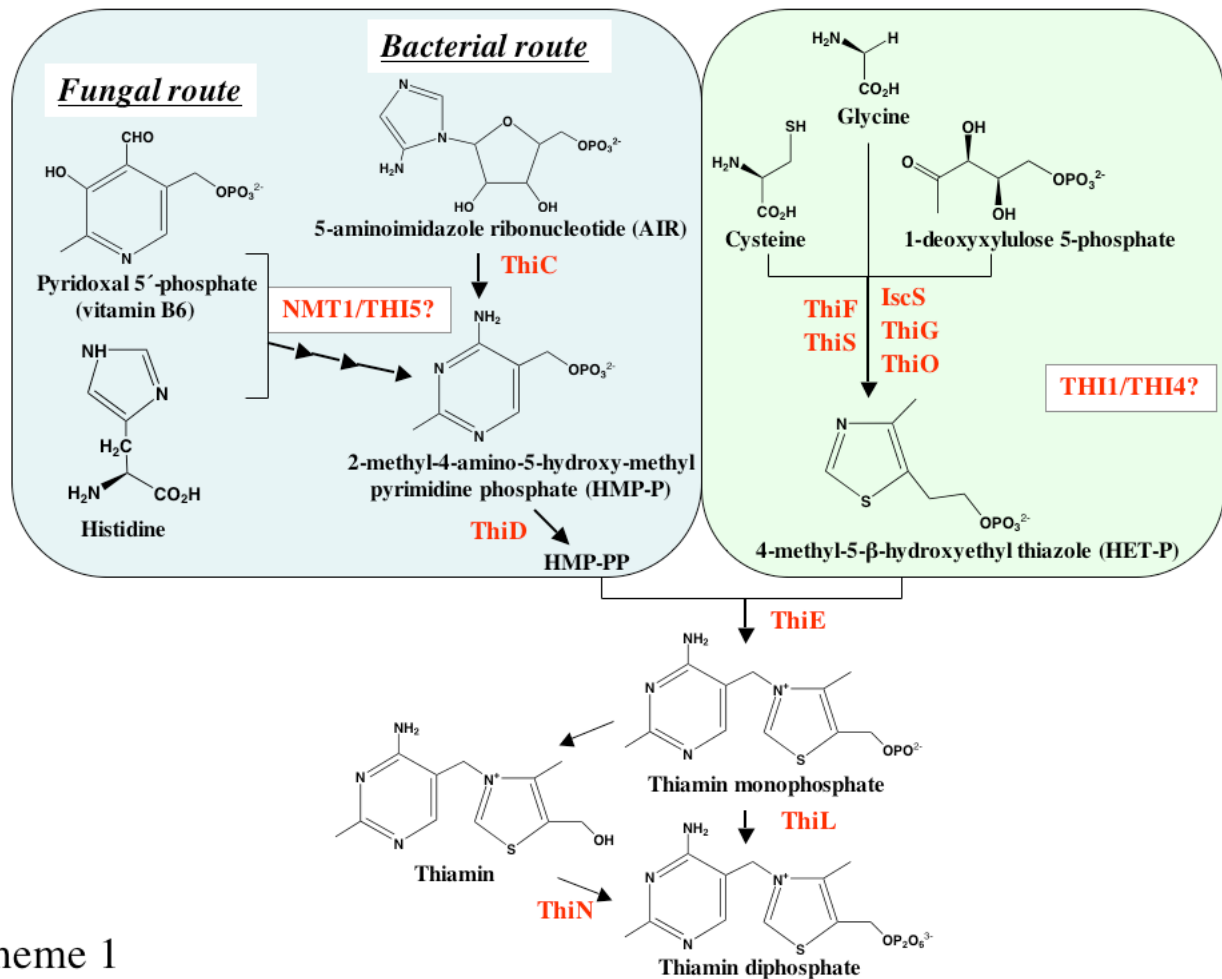

Scheme 1

Supplement: pnas_0709597104_1.pdf [file pnas_0709597104_1.pdf]
